# Supplementary material for: Membrane phosphatidylserine allosterically regulates the cytosolic phospholipase A2 activityviaan electrostatic-switch mechanism
Source: Royal Society of Chemistry journal article supplement (doi:10.1039/d1sm01791h), 2022-01-01
Supplement: d1sm01791h1.pdf [file d1sm01791h1.pdf]

## Supplementary Information

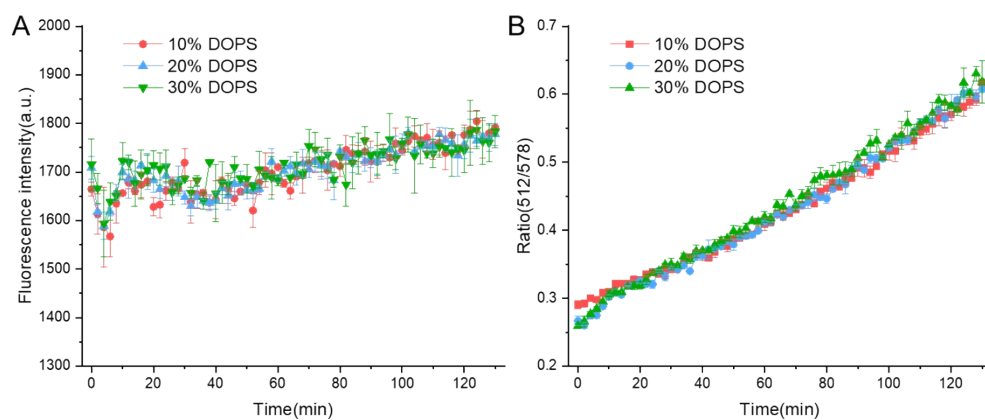

**Figure S1.** Time course of fluorescence intensity at 512 nm (A) and ratio (512/578) (B) on the DOPC/DOPS membrane containing 10%, 20%, and 30 % DOPS in the absence of cPLA2s.

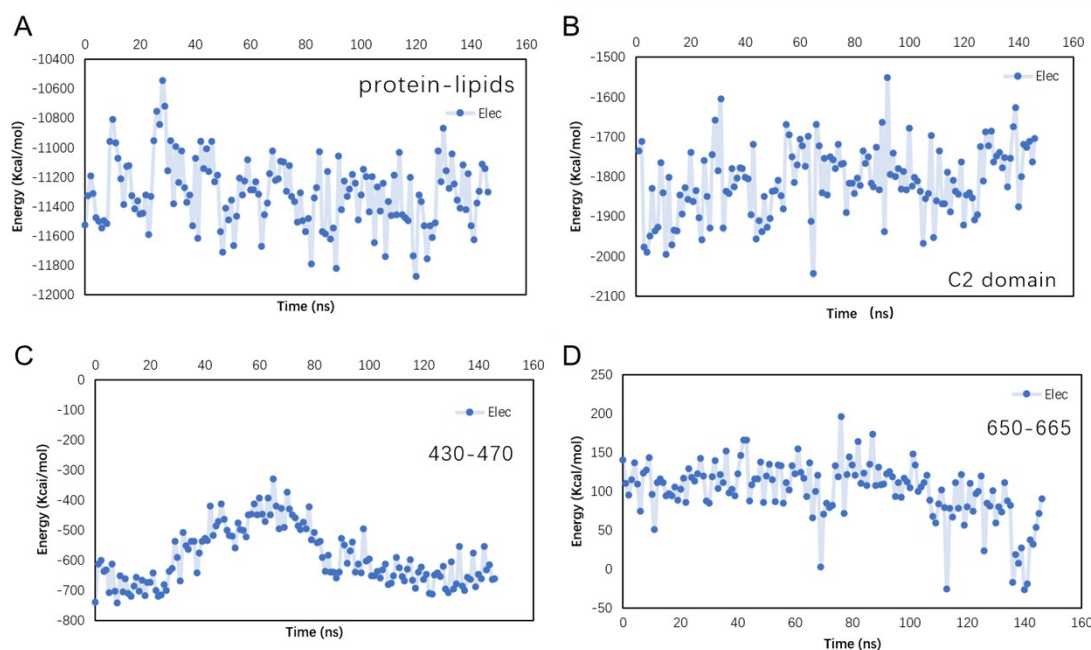

**Figure S2** The electronic forces of cPLA2 (A), C2domain, residue 430-470 or residue 650-665 with the 100% PS membrane as a function of simulation time.
